# Supplementary figures and images for: The first total synthesis of natural grenadamide
Source: Royal Society of Chemistry journal article supplement (doi:10.1039/b513774h), 2005-12-12

## Supplementary data

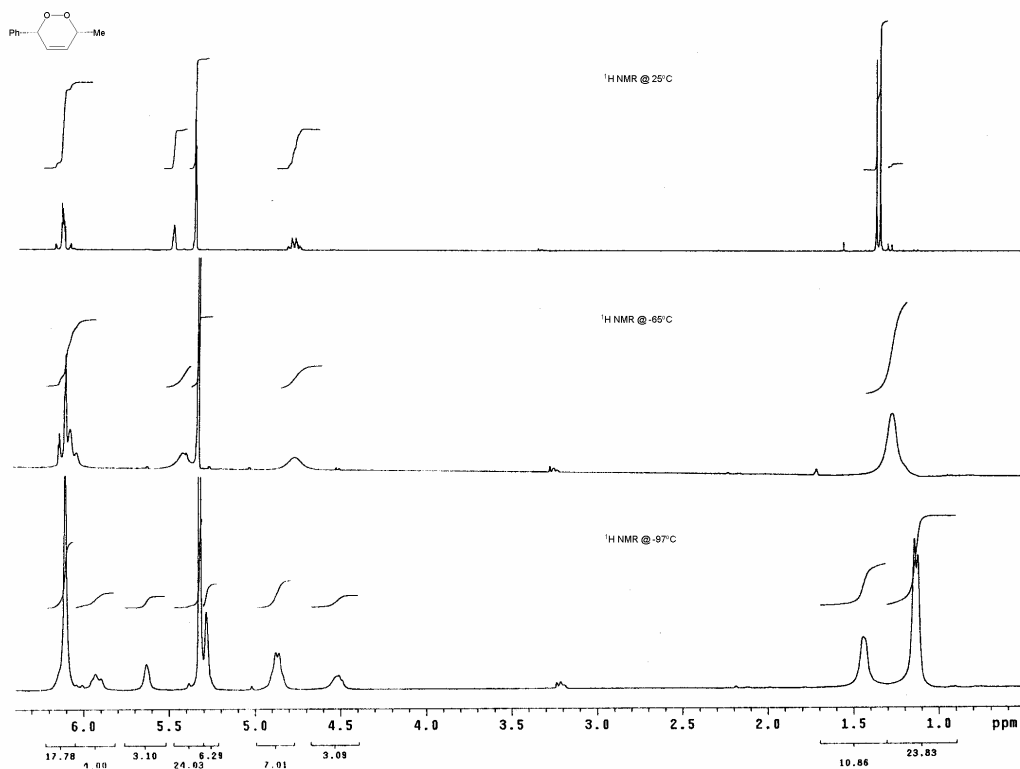

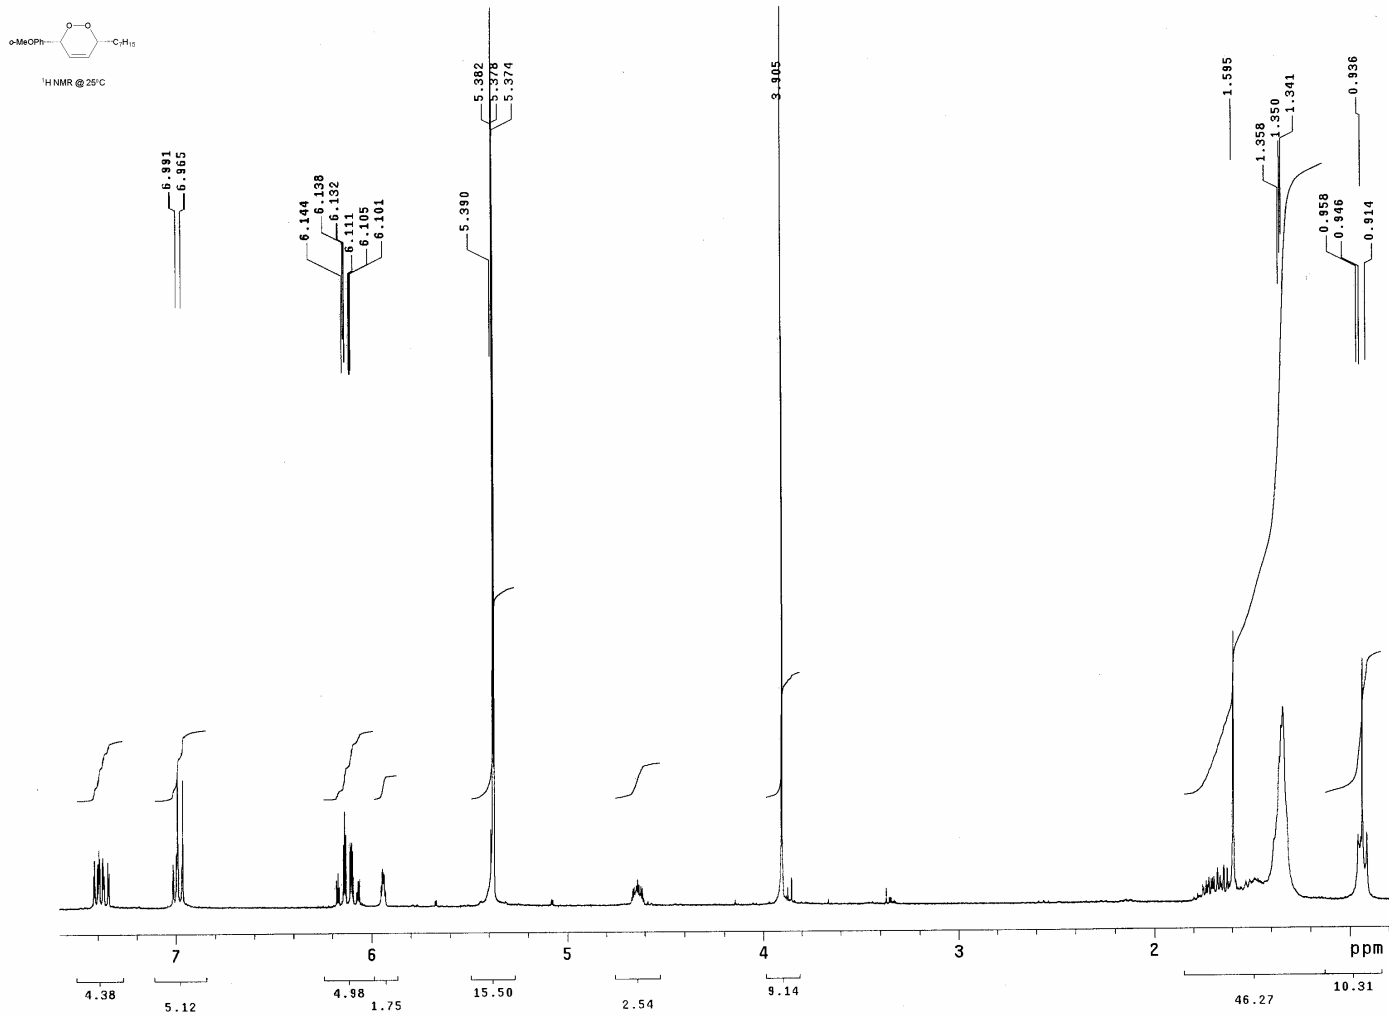

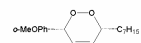

<sup>1</sup>H NMR @ -53°C

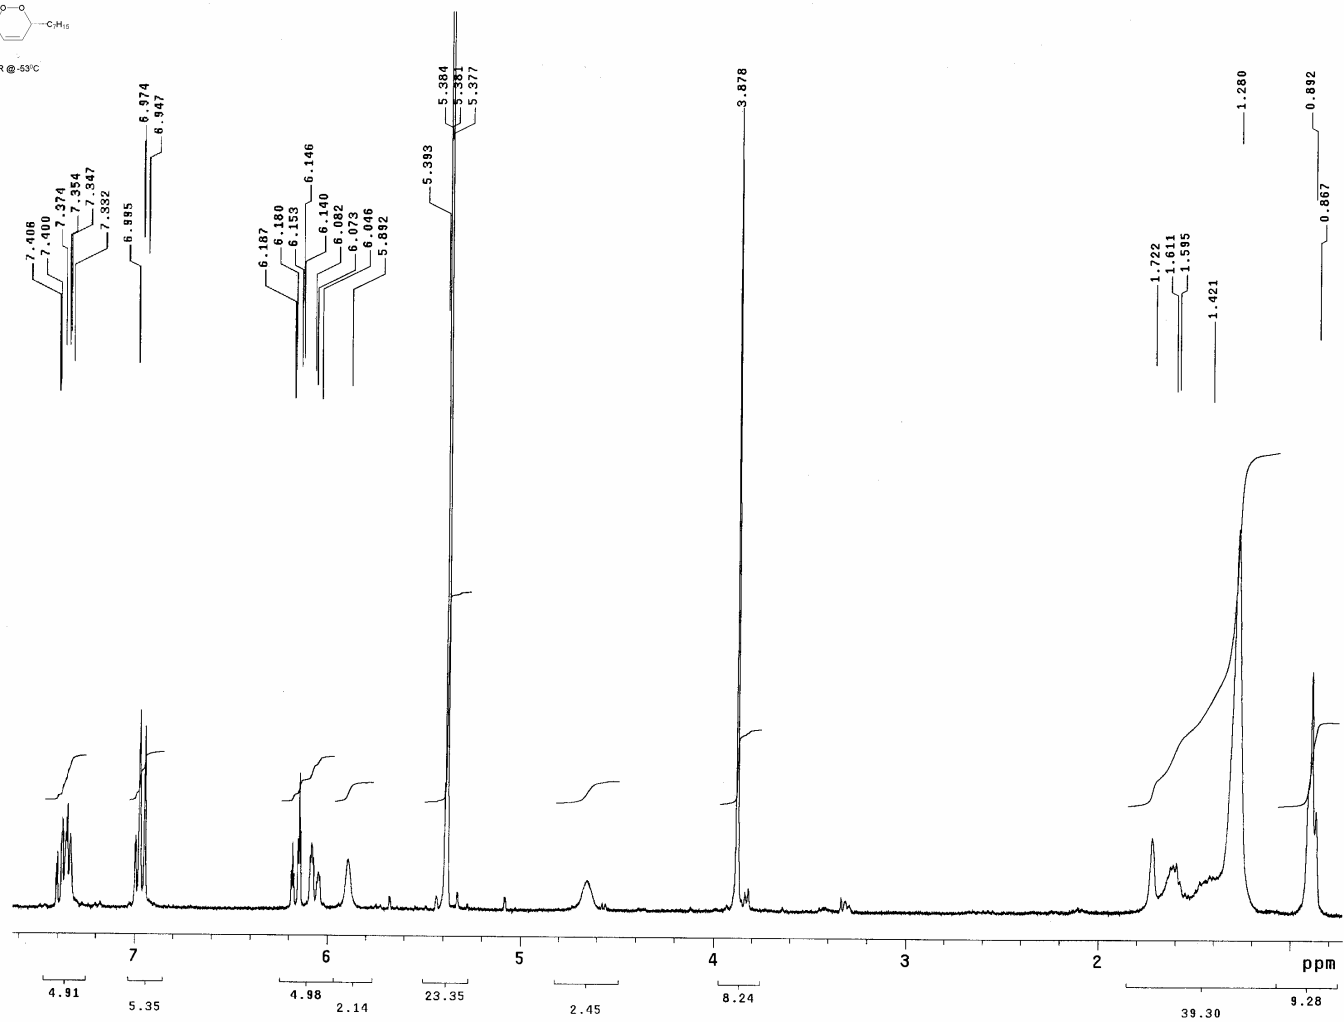

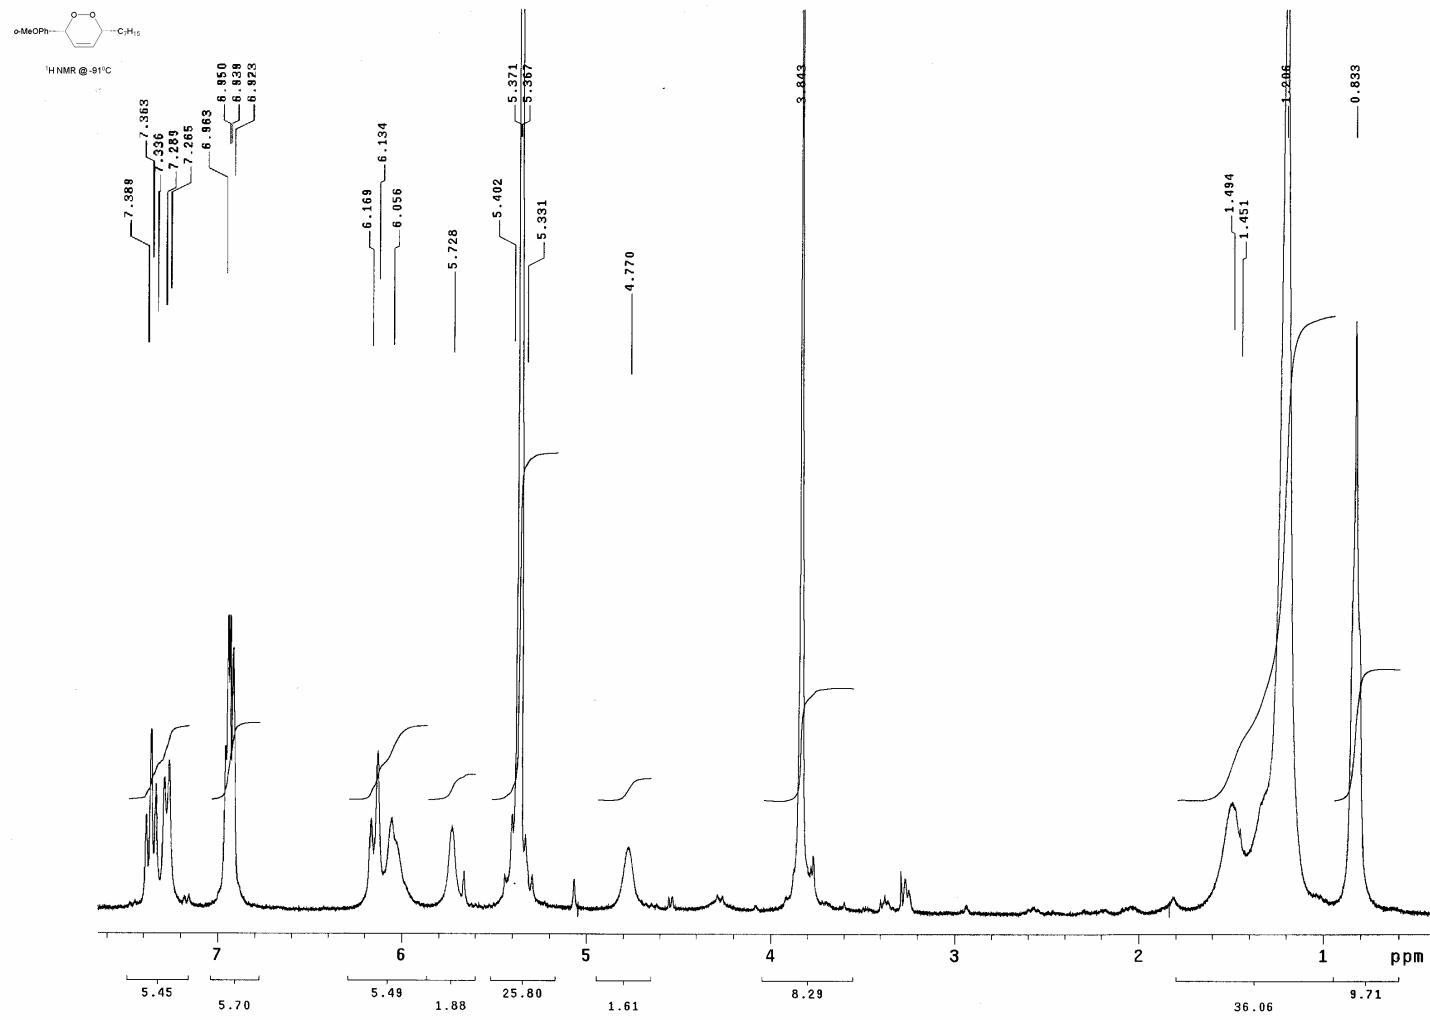

Supplement: b513774h.pdf [file b513774h.pdf]

## Supplementary data





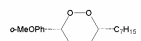

<sup>1</sup>H NMR @ -53°C

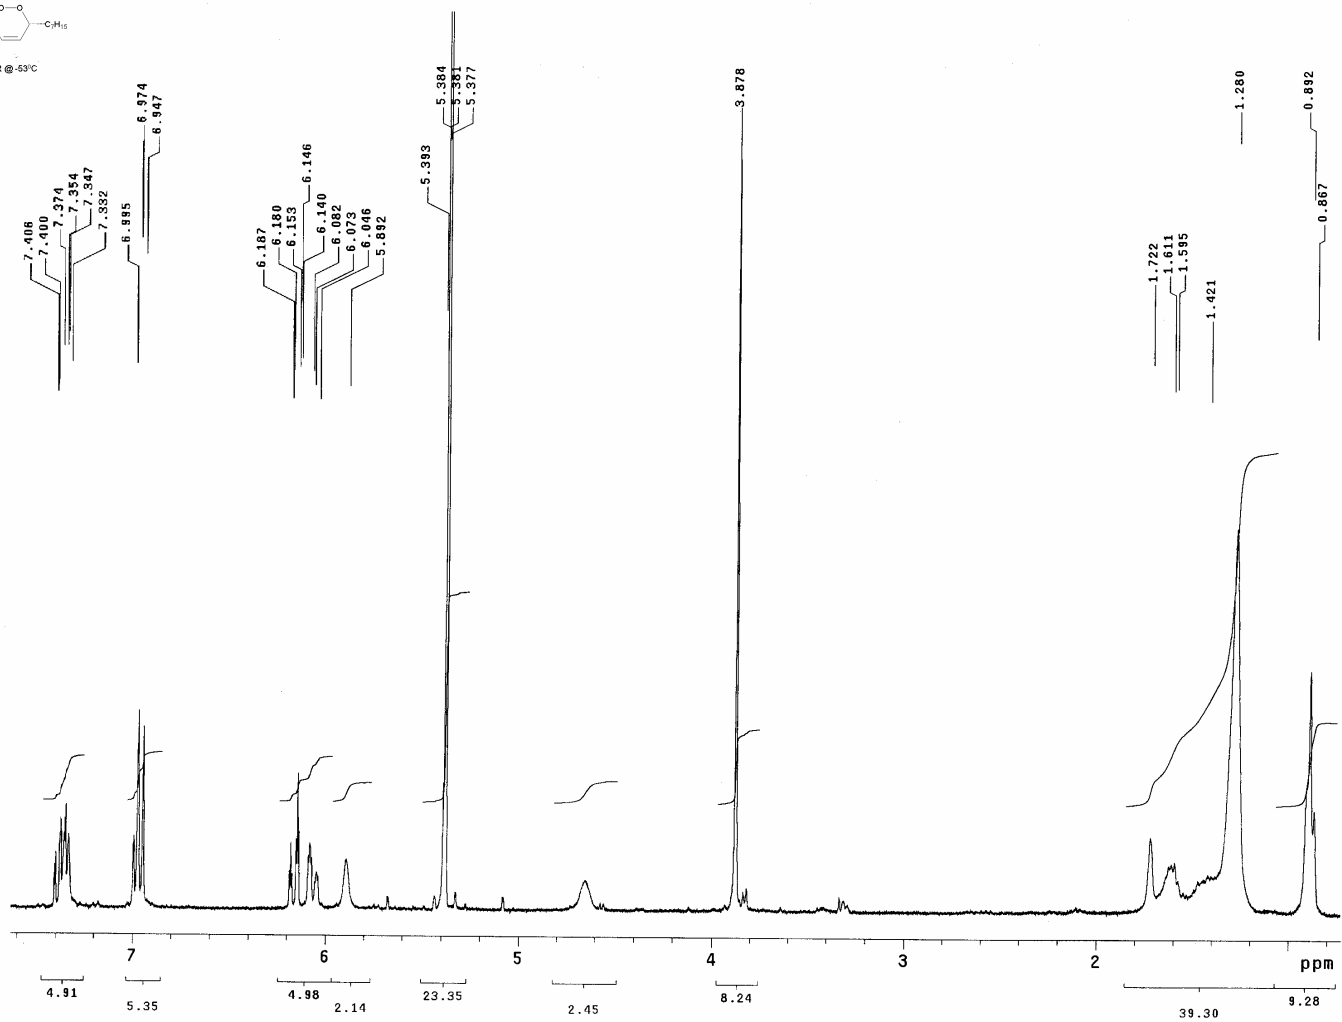



Supplement: b513774h.pdf [file b513774h.pdf]
